# Supplementary material for: WRF-Chem simulations of snow nitrate and other physicochemical properties in northern China
Source: Copernicus journal article supplement (doi:10.5194/gmd-18-651-2025), 2025-02-07
Supplement: Supplementary file 1 [file gmd-18-651-2025-supplement.pdf]

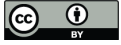

*Supplement of*

## **WRF-Chem simulations of snow nitrate and other physicochemical properties in northern China**

**Xia Wang et al.**

*Correspondence to:* Chun Zhao ([chunzhao@ustc.edu.cn](mailto:chunzhao@ustc.edu.cn)) and Lei Geng ([genglei@ustc.edu.cn](mailto:genglei@ustc.edu.cn))

The copyright of individual parts of the supplement might differ from the article licence.

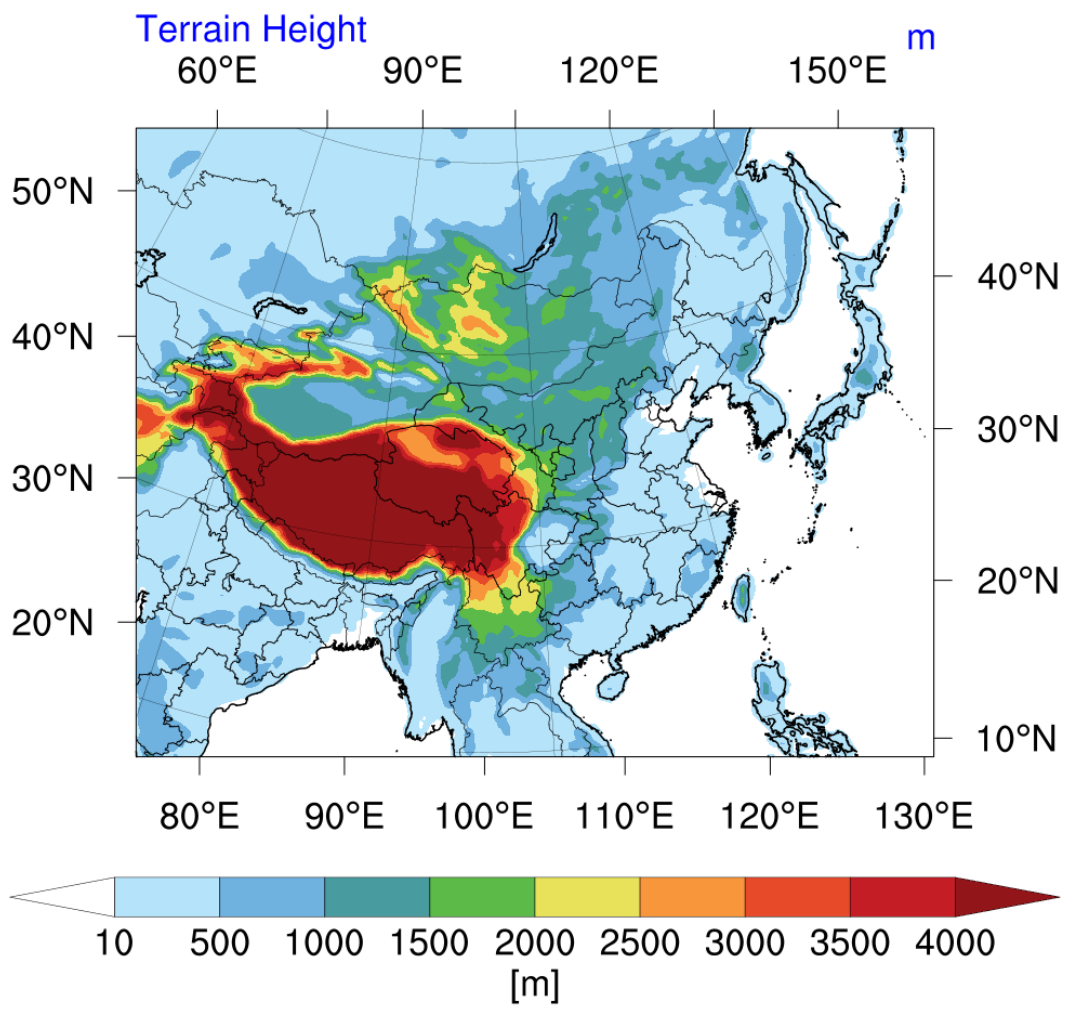

**Figure S1.** Simulation domain. The color shading represents the topography height (m)

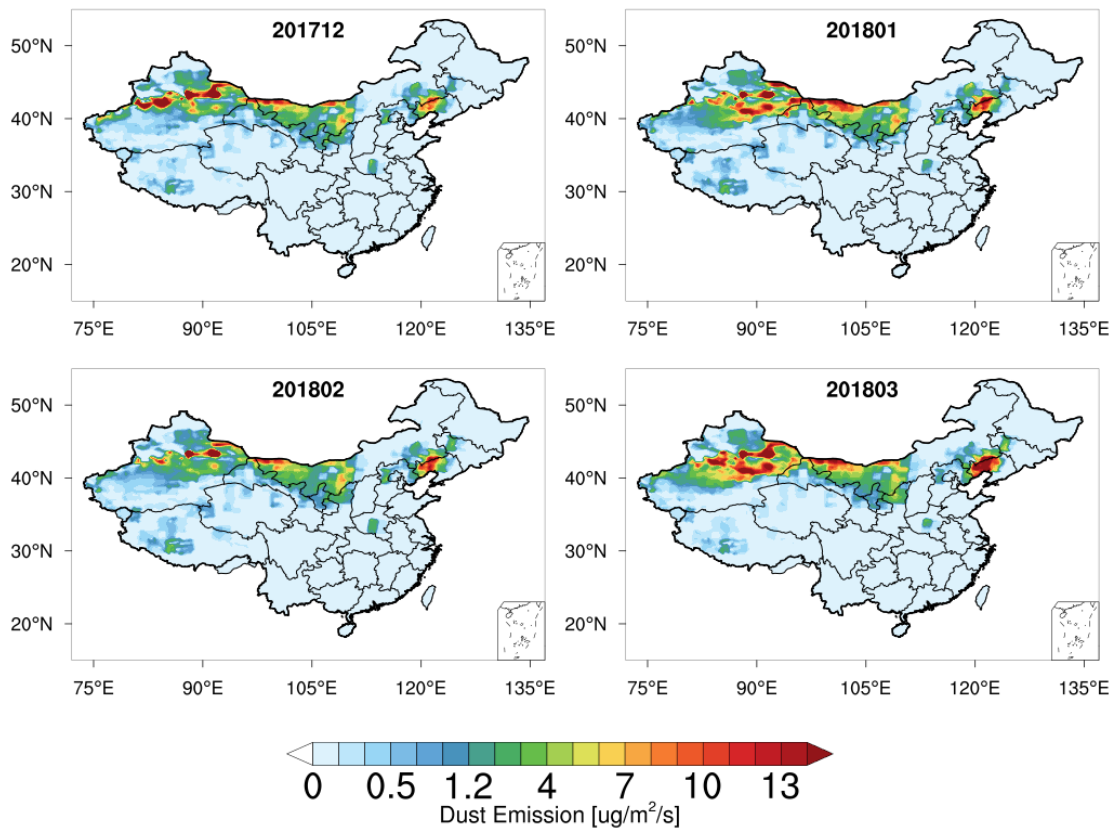

**Figure S2.** Spatial distribution of dust emissions ( $\mu\text{g}/\text{m}^2/\text{s}$ ) across China from December 2017 to March 2018.

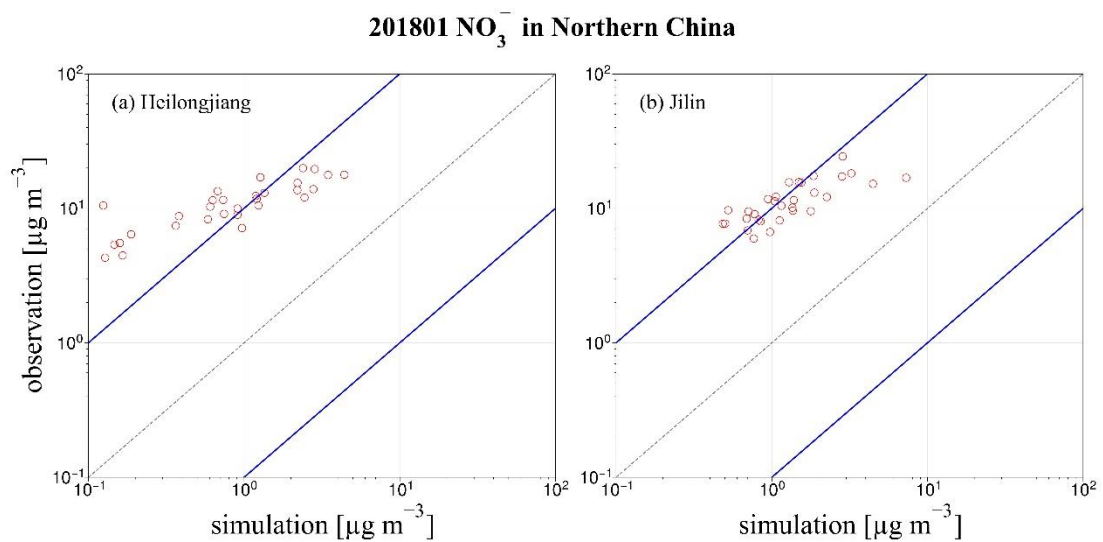

**Figure S3.** Observed atmospheric nitrate concentrations in (a) Heilongjiang and (b) Jilin versus the corresponding WRF-Chem simulations for January 2018 in Northern China.

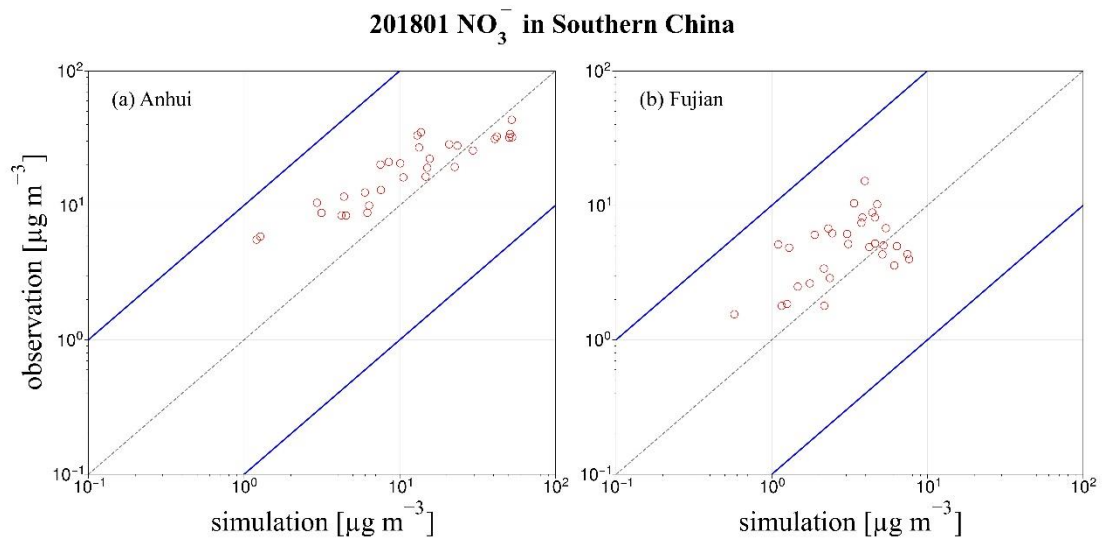

**Figure S4.** Observed atmospheric nitrate concentrations in (a) Anhui and (b) Fujian versus the corresponding WRF-Chem simulations for January 2018 in Southern China.

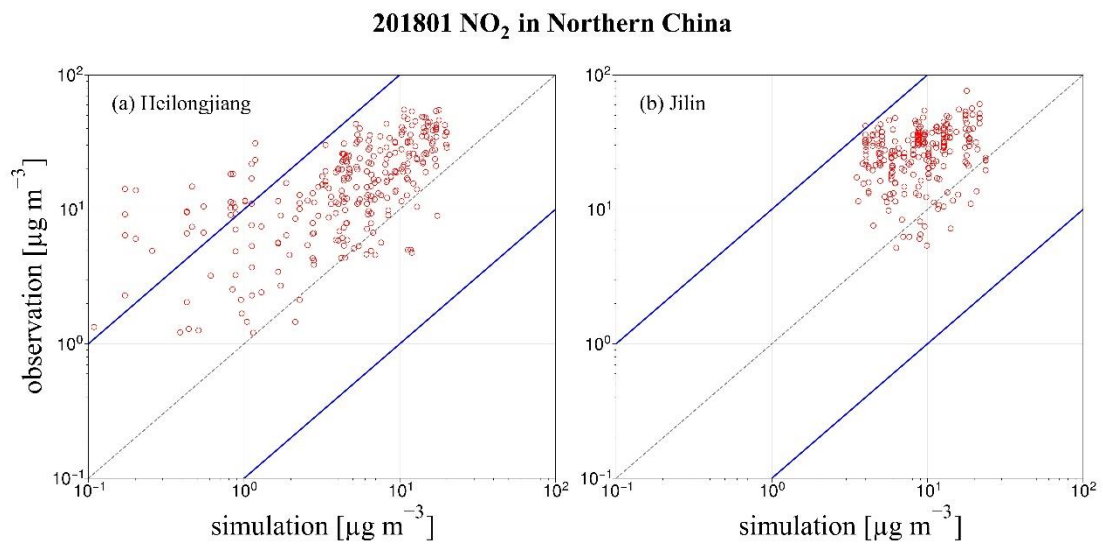

**Figure S5.** Observed atmospheric NO<sub>2</sub> concentrations in (a) Heilongjiang and (b) Jilin versus the corresponding WRF-Chem simulations for January 2018 in Northern China.

**Table S1.** Geographical location and stratified snow depth information (observed and simulated) for the eight sites in Figure 10.

| Site  | Date       | Latitude | Longitude | Observed Depth (cm) | Simulated Depth (cm) |
|-------|------------|----------|-----------|---------------------|----------------------|
| site1 | 2018-03-10 | 51.1303  | 121.2694  | 0-5                 | 0-3                  |
|       |            |          |           | 5-10                | 3-7                  |
|       |            |          |           | 10-15               | 7-18                 |
| site2 | 2018-03-05 | 42.4668  | 127.8730  | 0-10                | 0-3                  |
|       |            |          |           | 10-25               | 3-7                  |
| site3 | 2018-03-10 | 51.4380  | 121.5345  | 0-5                 | 0-3                  |
|       |            |          |           | 5-10                | 3-7                  |
|       |            |          |           | 10-13               | 7-18                 |
| site4 | 2017-12-28 | 42.4668  | 127.8730  | 0-5                 | 0-3                  |
|       |            |          |           | 5-10                | 3-7                  |
|       |            |          |           | 10-15               | 7-18                 |
| site5 | 2018-03-07 | 46.6736  | 120.0428  | 0-5                 | 0-3                  |
|       |            |          |           | 5-10                | 3-7                  |
|       |            |          |           | 10-15               | 7-18                 |
| site6 | 2018-03-10 | 51.6836  | 121.8797  | 0-5                 | 0-3                  |
|       |            |          |           | 5-10                | 3-7                  |
|       |            |          |           | 10-15               | 7-18                 |
| site7 | 2018-03-13 | 46.5359  | 129.5007  | 0-5                 | 0-3                  |
|       |            |          |           | 5-10                | 3-7                  |
|       |            |          |           | 10-12               | 7-18                 |
| site8 | 2018-03-08 | 47.5509  | 119.3758  | 0-5                 | 0-3                  |
|       |            |          |           | 5-10                | 3-7                  |
|       |            |          |           | 10-15               | 7-18                 |
|       |            |          |           | 15-20               | 18-20                |
